# Supplementary material for: Chinese Cabbage MYELOBLASTOSIS116 Homolog Confers Cd Tolerance in Yeast through Activation of The Facilitator of Iron Transport 3 which Reduces Cd Accumulation in Chinese Cabbage
Source: Preprints.org preprint supplement (doi:10.20944/preprints202308.1324.v1), 2023-08-18
Supplement: Supplementary file 1 [file supplementary]

**Supplemental Table S1.** Primer Sequences. Capital lettering indicates sequences from genes, lower case from vectors.

| Primer name                        | Sequence                                                     |
|------------------------------------|--------------------------------------------------------------|
| BraMYB116 (CDS) F                  | 5' ATGTCAAATATAACAAAGAA 3'                                   |
| BraMYB116 (CDS) R                  | 5' CTAATTAAAGTGTGCATACT 3'                                   |
| ScFIT3 (CDS) F                     | 5' ATGAAATTCTCTTCCGCTTTGGTTC 3'                              |
| ScFIT3 (CDS) R                     | 5' TTACAATAACATGACGGCAGCAAG 3'                               |
| BrMYB116-pRS416-GFP F              | 5' caaatctagaactagATGTCAAATATAATGAAGAAGAGGTGTAATGAAAAT 3'    |
| BrMYB116-pRS416-GFP R              | 5' cgggggatccactagaATTAAAAGGTGCGTACTCCTCAAAC 3'              |
| ScFIT3-pRS416-GFP F                | 5' caaatctagaactagATGAAATTCTCTTCCGCTTTGGT 3'                 |
| ScFIT3-pRS416-GFP R                | 5' cgggggatccactaggCAATAACATGACGGCAGCAAGG 3'                 |
| NSR1 IF423 F(BamH1)                | 5' gctctagaactagtATGGCTAAGACTACTAAAGTAAAAAG 3'               |
| NSR1 IF423 R(BamH1)                | 5' GTCCTCGGTGTTGTCTCCTCCTCCTCCTCCTCCATCAAATGTTTTCTTTGAACC 3' |
| VLD1 IF423 F(BamH1)                | 5' ATGTTGCATTTGGAAGATGAC 3'                                  |
| VLD1 IF423 R(BamH1)                | 5' GTCCTCGGTGTTGTCTCCTCCTCCTCCTCCTTCGCGATATTCAGTAGAGG 3'     |
| DsRFP IF423 F(BamH1)               | 5' GACAACACCGAGGACGTCATC 3'                                  |
| DsRFP IF423 R(BamH1)               | 5' gcagcccggggatcTACTGGGAGCCGGAGTG 3'                        |
| BrMYB116 IF3300 F(Xba1)            | 5' gtacccggggatcctTGATAGCCACTGATAGGTTT 3'                    |
| BrMYB116 IF3300 F(Xba1)            | 5' gcaggtcgactctagCTAATTTAAAGGTGCGTACT 3'                    |
| ScFIT3 IF3300 F(Xba1)              | 5' gtacccggggatcct TTAGCCCATTTTTCACTGTT 3'                   |
| ScFIT3 IF3300 F(Xba1)              | 5' gcaggtcgactctagTTACAATAACATGACGGCA 3'                     |
| <b>Luciferase assay constructs</b> |                                                              |
| Firefly luciferase F               | 5' CCCTAAACCCTAAAAATGGAAGACGCCAAA 3'                         |
| Firefly luciferase R               | 5' CGACTCTAGAGGATCCGACTCTAGAGGATCTTACACGG 3'                 |
| Fluc-pCambia3300 F                 | 5' CCCTAAAATGGAAGACGCCAAAAACATAAGAA 3'                       |
| Fluc-pCambia3300 R                 | 5' CGACTCTAGAGGATCTTACACGGCGATCTTTCCGC 3'                    |
| pScFIT3 F                          | 5' TTTAGGGATTATTGTTATTAGTTATTTTT 3'                          |
| pScFIT3 R                          | 5' TTAGCCCATTTTTCACTG 3'                                     |
| pScFIT3-pCambia3300 F              | 5' gaattcccggggatcTTTAGGGATTATTGTTATTAGTTATTTTTAAGCGAGTGG 3' |
| pScFIT3-pCambia3300 R              | 5' gcaggtcgacggatcTTAGCCCATTTTTCACTGTTATCACAACT 3'           |
| <b>RT-qPCR primers</b>             |                                                              |
| BraMYB116 q F                      | 5' TGGACACTCGAGGAAGACAC 3'                                   |
| BraMYB116 q R                      | 5' CCACGCTTTATGTGGGTTT 3'                                    |
| BrACT2 q F                         | 5' GAGATTACATGCCCAGAAGTCTTG 3'                               |
| BrACT2 q R                         | 5' ACCTGCCTCATCATACTCGGC 3'                                  |

**Supplementary Table S3.** Significantly enriched Gene Ontology (GO) terms of DEGs. Expression patterns of some DEGs annotated to the given GO-term. Corrected P-value  $\leq 0.05$  defined as significantly enriched GO terms in DEGs.

| Gene Ontology term                 | Cluster frequency          | Corrected P Value |
|------------------------------------|----------------------------|-------------------|
| transporter activity               | 20 out of 155 genes, 14.2% | 0.020405095       |
| transmembrane transporter activity | 17 out of 155 genes, 11.0% | 0.020405095       |
