# Supplementary material for: Chinese Cabbage MYELOBLASTOSIS116 Homolog Confers Cd Tolerance in Yeast through Activation of The Facilitator of Iron Transport 3 which Reduces Cd Accumulation in Chinese Cabbage
Source: Preprints.org preprint supplement (doi:10.20944/preprints202308.1324.v1), 2023-08-18
Supplement: Supplementary file 1 [file Supplementary Table S2.xlsx]

## Sheet: MYB116vsWT_deg_all
Supplementary Table S2. The fold change of the BrMYB116 compared to the wild type control.
Gene ID	Log2 (FoldChange)	Corrected P Value
gene-CENPK1137D_4855	5.99309	7.63141e-48
gene-CENPK1137D_521	4.71389	4.82642e-11
gene-CENPK1137D_5283	3.58558	6.27099e-18
gene-CENPK1137D_2397	3.55603	0.0237152
gene-CENPK1137D_417	3.51928	3.5706e-07
gene-CENPK1137D_5368	3.35117	3.94736e-08
gene-CENPK1137D_699	3.13017	0.0221978
gene-CENPK1137D_138	3.0405	0.0269371
gene-CENPK1137D_2490	2.97977	0.0258813
gene-CENPK1137D_350	2.94354	2.08333e-06
gene-CENPK1137D_3371	2.90129	0.00561643
gene-CENPK1137D_3711	2.86868	0.0139183
gene-CENPK1137D_4103	2.86684	2.70693e-12
gene-CENPK1137D_2407	2.82748	0.0488841
gene-CENPK1137D_4041	2.77303	2.44143e-08
gene-CENPK1137D_1300	2.6019	0.0175143
gene-CENPK1137D_4842	2.59386	0.0459976
gene-CENPK1137D_1731	2.57996	0.00104083
gene-CENPK1137D_2399	2.46544	0.00640946
gene-CENPK1137D_4616	2.45774	0.00347061
gene-CENPK1137D_508	2.3977	0.00193947
gene-CENPK1137D_2271	2.33906	0.023178
gene-CENPK1137D_1838	2.3188	0.0149404
gene-CENPK1137D_439	2.3132	0.00570152
gene-CENPK1137D_2006	2.31062	0.00515517
gene-CENPK1137D_1557	2.30004	0.0032944
gene-CENPK1137D_3180	2.27194	0.0131099
gene-CENPK1137D_86	2.22217	0.000558196
gene-CENPK1137D_3428	2.22193	0.00360167
gene-CENPK1137D_2007	2.20259	0.0235842
gene-CENPK1137D_2751	2.19109	0.00269144
gene-CENPK1137D_3153	2.18503	1.37884e-05
gene-CENPK1137D_5330	2.11659	0.00916003
gene-CENPK1137D_115	2.11127	0.0144643
gene-CENPK1137D_2292	2.10896	0.0171699
gene-CENPK1137D_3710	2.07456	0.0109942
gene-CENPK1137D_4475	2.06253	0.00149804
gene-CENPK1137D_2381	2.04359	3.08979e-05
gene-CENPK1137D_387	2.03294	0.00538439
gene-CENPK1137D_2483	1.9841	0.00688702
gene-CENPK1137D_857	1.98112	2.13316e-05
gene-CENPK1137D_1111	1.97748	1.98226e-06
gene-CENPK1137D_3475	1.95549	0.0368507
gene-CENPK1137D_3859	1.95515	3.1159e-06
gene-CENPK1137D_2433	1.93837	0.0139183
gene-CENPK1137D_1846	1.90985	0.00830926
gene-CENPK1137D_3678	1.90837	0.0172848
gene-CENPK1137D_40	1.88642	5.50753e-06
gene-CENPK1137D_227	1.87458	0.000772891
gene-CENPK1137D_487	1.8557	0.0199125
gene-CENPK1137D_4595	1.85504	1.05246e-07
gene-CENPK1137D_2586	1.8466	0.0198513
gene-CENPK1137D_3814	1.83438	0.0367388
gene-CENPK1137D_2236	1.82619	0.0155997
gene-CENPK1137D_2224	1.82288	0.00337439
gene-CENPK1137D_4071	1.81498	2.82246e-07
gene-CENPK1137D_1682	1.81268	1.01262e-06
gene-CENPK1137D_3078	1.80738	0.0017095
gene-CENPK1137D_3621	1.78051	0.0142762
gene-CENPK1137D_2345	1.7731	0.00680714
gene-CENPK1137D_5159	1.76103	0.0230868
gene-CENPK1137D_5163	1.75231	0.00332467
gene-CENPK1137D_1463	1.74052	0.0175656
gene-CENPK1137D_2822	1.73442	5.30672e-10
gene-CENPK1137D_4714	1.7258	6.93082e-13
gene-CENPK1137D_535	1.7122	0.00478172
gene-CENPK1137D_153	1.70706	0.00913972
gene-CENPK1137D_2055	1.69829	0.00599699
gene-CENPK1137D_679	1.66617	0.0351663
gene-CENPK1137D_322	1.65919	0.00116278
gene-CENPK1137D_291	1.65912	0.000105757
gene-CENPK1137D_5384	1.65232	0.0360832
gene-CENPK1137D_2001	1.65026	1.14429e-06
gene-CENPK1137D_1643	1.64538	0.00572918
gene-CENPK1137D_4443	1.64288	5.50753e-06
gene-CENPK1137D_1208	1.64023	0.00913972
gene-CENPK1137D_4335	1.61995	2.82246e-07
gene-CENPK1137D_1462	1.61098	0.00154225
gene-CENPK1137D_3725	1.59796	4.06295e-05
gene-CENPK1137D_1021	1.59679	0.00732643
gene-CENPK1137D_434	1.59282	1.98226e-06
gene-CENPK1137D_65	1.58127	0.0227038
gene-CENPK1137D_4094	1.57689	0.00189241
gene-CENPK1137D_2748	1.56186	0.0190576
gene-CENPK1137D_4984	1.5594	0.00916003
gene-CENPK1137D_5033	1.55042	0.00795607
gene-CENPK1137D_1150	1.54341	0.049478
gene-CENPK1137D_5005	1.54097	0.00536866
gene-CENPK1137D_3075	1.54063	4.06295e-05
gene-CENPK1137D_1062	1.53727	0.000463056
gene-CENPK1137D_3111	1.53146	8.3048e-07
gene-CENPK1137D_2657	1.5306	0.0190576
gene-CENPK1137D_1257	1.52106	0.0221102
gene-CENPK1137D_1940	1.51028	0.0493005
gene-CENPK1137D_1104	1.50803	0.0445039
gene-CENPK1137D_1575	1.49407	0.000940671
gene-CENPK1137D_832	1.49111	0.000407547
gene-CENPK1137D_2413	1.48276	0.0263786
gene-CENPK1137D_3118	1.48244	0.0263786
gene-CENPK1137D_3600	1.48096	0.0316849
gene-CENPK1137D_3798	1.47743	0.0400972
gene-CENPK1137D_4548	1.47741	0.0284251
gene-CENPK1137D_1521	1.475	0.0411543
gene-CENPK1137D_2152	1.47307	0.0403541
gene-CENPK1137D_5240	1.46436	0.044206
gene-CENPK1137D_1645	1.46371	0.0122384
gene-CENPK1137D_3383	1.45991	0.0435327
gene-CENPK1137D_1283	1.45631	5.0541e-05
gene-CENPK1137D_4074	1.44393	0.0157138
gene-CENPK1137D_1400	1.43283	0.0217982
gene-CENPK1137D_3907	1.42922	0.00570251
gene-CENPK1137D_4734	1.41087	0.0152593
gene-CENPK1137D_1478	1.40046	0.0368507
gene-CENPK1137D_4636	1.39309	2.70059e-05
gene-CENPK1137D_2985	1.39304	2.68137e-08
gene-CENPK1137D_82	1.38869	0.013417
gene-CENPK1137D_3088	1.38753	0.0372259
gene-CENPK1137D_3216	1.38634	0.0242817
gene-CENPK1137D_4039	1.38572	0.00373704
gene-CENPK1137D_2040	1.38397	0.034527
gene-CENPK1137D_3198	1.38231	8.69251e-06
gene-CENPK1137D_3810	1.38144	0.00402094
gene-CENPK1137D_4134	1.36537	0.0017726
gene-CENPK1137D_2587	1.36292	0.0181766
gene-CENPK1137D_3557	1.35802	0.0326301
gene-CENPK1137D_4894	1.35757	0.0388501
gene-CENPK1137D_4343	1.3565	0.0408202
gene-CENPK1137D_3115	1.34767	0.0199125
gene-CENPK1137D_236	1.33836	0.0382833
gene-CENPK1137D_35	1.33709	0.023178
gene-CENPK1137D_5045	1.3329	3.79073e-05
gene-CENPK1137D_1876	1.32381	0.00822131
gene-CENPK1137D_5142	1.32377	0.00718319
gene-CENPK1137D_5153	1.31941	0.0242817
gene-CENPK1137D_1545	1.31815	0.00760656
gene-CENPK1137D_4838	1.31438	0.0330222
gene-CENPK1137D_1589	1.31424	0.000149286
gene-CENPK1137D_2370	1.30609	0.00614386
gene-CENPK1137D_2398	1.304	0.0152961
gene-CENPK1137D_1139	1.28645	0.00172478
gene-CENPK1137D_4446	1.27881	0.000640201
gene-CENPK1137D_1175	1.27292	0.0258863
gene-CENPK1137D_3509	1.26948	0.00324286
gene-CENPK1137D_3294	1.26913	0.0240545
gene-CENPK1137D_4623	1.26764	0.00499152
gene-CENPK1137D_3410	1.26623	0.000444342
gene-CENPK1137D_898	1.26388	0.00784138
gene-CENPK1137D_1933	1.26184	0.000551429
gene-CENPK1137D_1532	1.25822	0.0139183
gene-CENPK1137D_3342	1.25589	0.000558196
gene-CENPK1137D_3721	1.25104	0.049961
gene-CENPK1137D_786	1.25023	0.0139183
gene-CENPK1137D_4618	1.24947	0.0191661
gene-CENPK1137D_2235	1.24775	0.0101604
gene-CENPK1137D_1371	1.2474	0.00324344
gene-CENPK1137D_4183	1.24727	0.00833679
gene-CENPK1137D_1572	1.24685	0.0101068
gene-CENPK1137D_1581	1.24456	0.032182
gene-CENPK1137D_1198	1.23853	0.00736245
gene-CENPK1137D_2331	1.23739	0.00764456
gene-CENPK1137D_787	1.2326	0.0326114
gene-CENPK1137D_4767	1.23237	0.000711094
gene-CENPK1137D_1639	1.22992	0.00317941
gene-CENPK1137D_134	1.2277	0.0137166
gene-CENPK1137D_1552	1.21349	0.0212503
gene-CENPK1137D_3918	1.21053	0.0236978
gene-CENPK1137D_2740	1.20512	0.0275163
gene-CENPK1137D_2395	1.20416	0.00462685
gene-CENPK1137D_1146	1.19849	0.0289044
gene-CENPK1137D_1894	1.18993	0.0342721
gene-CENPK1137D_526	1.18371	0.000376566
gene-CENPK1137D_900	1.18314	0.000932496
gene-CENPK1137D_3558	1.18203	0.0442387
gene-CENPK1137D_4533	1.17084	0.0057762
gene-CENPK1137D_4560	1.16432	0.0499247
gene-CENPK1137D_611	1.15654	0.0217982
gene-CENPK1137D_622	1.15175	0.0317431
gene-CENPK1137D_539	1.15083	0.00522854
gene-CENPK1137D_1476	1.14864	0.00165388
gene-CENPK1137D_2014	1.14854	0.0209598
gene-CENPK1137D_2434	1.14604	0.0303804
gene-CENPK1137D_5141	1.13408	0.0382218
gene-CENPK1137D_2263	1.13153	0.0244341
gene-CENPK1137D_5092	1.13095	0.014263
gene-CENPK1137D_46	1.12955	0.0488544
gene-CENPK1137D_688	1.12908	0.00255646
gene-CENPK1137D_5323	1.128	0.0026094
gene-CENPK1137D_1061	1.12694	0.00572975
gene-CENPK1137D_2242	1.12523	0.00114936
gene-CENPK1137D_4473	1.11755	0.0175143
gene-CENPK1137D_566	1.1145	0.00561643
gene-CENPK1137D_2428	1.11416	0.00269144
gene-CENPK1137D_1809	1.10364	0.0239768
gene-CENPK1137D_219	1.10104	0.0217982
gene-CENPK1137D_2231	1.09463	0.0488544
gene-CENPK1137D_3523	1.09118	0.000274701
gene-CENPK1137D_3510	1.08967	0.00774289
gene-CENPK1137D_3316	1.08652	0.00238768
gene-CENPK1137D_1322	1.08621	1.98226e-06
gene-CENPK1137D_563	1.08548	0.0411631
gene-CENPK1137D_4687	1.08075	0.0175143
gene-CENPK1137D_5135	1.08049	1.14429e-06
gene-CENPK1137D_4965	1.07884	0.0357994
gene-CENPK1137D_582	1.07659	0.00172478
gene-CENPK1137D_83	1.07558	0.00497443
gene-CENPK1137D_3036	1.06984	0.0488001
gene-CENPK1137D_4341	1.05961	0.0382833
gene-CENPK1137D_497	1.05777	0.0358446
gene-CENPK1137D_1231	1.05375	0.0307253
gene-CENPK1137D_2882	1.05187	0.046485
gene-CENPK1137D_650	1.0442	0.000615493
gene-CENPK1137D_2828	1.03917	0.00075236
gene-CENPK1137D_4700	1.03816	0.0254497
gene-CENPK1137D_4079	1.03474	0.0217982
gene-CENPK1137D_3712	1.03273	0.0272519
gene-CENPK1137D_3860	1.03263	0.00117864
gene-CENPK1137D_714	1.03142	0.0318771
gene-CENPK1137D_1223	1.02892	0.00189751
gene-CENPK1137D_31	1.02629	0.00916003
gene-CENPK1137D_2670	1.02598	0.046821
gene-CENPK1137D_3516	1.02259	0.0382833
gene-CENPK1137D_442	1.02241	0.00578751
gene-CENPK1137D_4261	1.02212	0.0363934
gene-CENPK1137D_3033	1.01524	0.0064077
gene-CENPK1137D_3159	1.01318	0.0017686
gene-CENPK1137D_3191	1.01229	0.00682282
gene-CENPK1137D_643	1.00683	0.0135993
gene-CENPK1137D_173	1.00205	0.044206
gene-CENPK1137D_4760	1.00076	0.0135504
gene-CENPK1137D_877	-1.00023	0.0175143
gene-CENPK1137D_4412	-1.00192	0.00302469
gene-CENPK1137D_564	-1.00201	0.0181967
gene-CENPK1137D_460	-1.00214	0.0126267
gene-CENPK1137D_2384	-1.00219	0.021017
gene-CENPK1137D_2858	-1.00289	0.0404623
gene-CENPK1137D_3777	-1.00461	0.0310008
gene-CENPK1137D_2852	-1.00682	0.0182717
gene-CENPK1137D_945	-1.00875	0.000413706
gene-CENPK1137D_4825	-1.01148	0.00497443
gene-CENPK1137D_3997	-1.0129	0.0487408
gene-CENPK1137D_3051	-1.01476	0.021369
gene-CENPK1137D_1387	-1.01612	0.0139183
gene-CENPK1137D_3238	-1.02255	0.0489895
gene-CENPK1137D_4382	-1.02549	0.0174298
gene-CENPK1137D_163	-1.02715	0.0411631
gene-CENPK1137D_3752	-1.02824	0.033504
gene-CENPK1137D_2251	-1.03178	0.0382833
gene-CENPK1137D_1619	-1.03199	0.0012652
gene-CENPK1137D_3018	-1.03381	0.0217982
gene-CENPK1137D_2701	-1.03829	0.00254811
gene-CENPK1137D_4578	-1.0389	0.0160553
gene-CENPK1137D_2941	-1.04086	0.0232232
gene-CENPK1137D_5289	-1.04115	0.0317306
gene-CENPK1137D_1004	-1.04136	0.0146479
gene-CENPK1137D_998	-1.04348	0.0322924
gene-CENPK1137D_2120	-1.04369	0.027291
gene-CENPK1137D_5101	-1.04547	0.0391965
gene-CENPK1137D_1679	-1.04616	0.00308576
gene-CENPK1137D_3964	-1.04814	0.0191973
gene-CENPK1137D_4960	-1.04888	0.0202923
gene-CENPK1137D_5446	-1.05103	3.46253e-06
gene-CENPK1137D_1841	-1.05114	0.00580873
gene-CENPK1137D_1746	-1.05659	0.0142762
gene-CENPK1137D_3417	-1.05699	0.00501855
gene-CENPK1137D_5236	-1.05864	0.0074299
gene-CENPK1137D_3746	-1.06321	0.014851
gene-CENPK1137D_2267	-1.06457	0.000654467
gene-CENPK1137D_735	-1.06606	0.027291
gene-CENPK1137D_1664	-1.06808	0.0306772
gene-CENPK1137D_148	-1.06881	0.00376309
gene-CENPK1137D_2713	-1.07702	0.00269144
gene-CENPK1137D_230	-1.086	0.0209598
gene-CENPK1137D_4704	-1.08606	0.015196
gene-CENPK1137D_5239	-1.08687	0.00189241
gene-CENPK1137D_3125	-1.09156	0.0133477
gene-CENPK1137D_3212	-1.09236	0.0227038
gene-CENPK1137D_742	-1.10086	0.0433031
gene-CENPK1137D_697	-1.10906	0.00403599
gene-CENPK1137D_1496	-1.11137	0.0122384
gene-CENPK1137D_1511	-1.11387	0.0192697
gene-CENPK1137D_1981	-1.12033	0.0143266
gene-CENPK1137D_776	-1.12447	0.0192431
gene-CENPK1137D_3545	-1.12626	0.0210263
gene-CENPK1137D_255	-1.12981	0.027291
gene-CENPK1137D_2942	-1.13529	0.0419772
gene-CENPK1137D_3858	-1.14566	0.0017095
gene-CENPK1137D_5371	-1.15059	0.00499152
gene-CENPK1137D_4897	-1.15778	0.0152593
gene-CENPK1137D_757	-1.16245	0.0292618
gene-CENPK1137D_4435	-1.16346	0.00938946
gene-CENPK1137D_3694	-1.1692	0.00511029
gene-CENPK1137D_547	-1.17008	0.000233111
gene-CENPK1137D_1364	-1.1703	0.00784253
gene-CENPK1137D_2827	-1.1707	0.0499255
gene-CENPK1137D_2964	-1.17237	0.0230032
gene-CENPK1137D_3639	-1.18358	0.00198807
gene-CENPK1137D_5006	-1.18588	1.29793e-08
gene-CENPK1137D_2241	-1.1876	0.034527
gene-CENPK1137D_1338	-1.19341	0.00854338
gene-CENPK1137D_310	-1.19378	0.00404359
gene-CENPK1137D_5216	-1.21189	0.0243533
gene-CENPK1137D_4741	-1.23388	0.00183265
gene-CENPK1137D_4211	-1.24016	0.0118109
gene-CENPK1137D_612	-1.25828	0.0101645
gene-CENPK1137D_2567	-1.2602	0.0397697
gene-CENPK1137D_4956	-1.26163	0.0243533
gene-CENPK1137D_4461	-1.27258	0.035508
gene-CENPK1137D_4517	-1.28151	0.00386381
gene-CENPK1137D_2186	-1.29364	0.0217982
gene-CENPK1137D_3740	-1.29933	0.0094116
gene-CENPK1137D_98	-1.30685	7.32128e-07
gene-CENPK1137D_5275	-1.32607	0.0300664
gene-CENPK1137D_3941	-1.33417	0.00047355
gene-CENPK1137D_4924	-1.34095	0.00998026
gene-CENPK1137D_784	-1.34317	1.98226e-06
gene-CENPK1137D_4925	-1.34828	0.00313669
gene-CENPK1137D_2502	-1.34907	0.000681014
gene-CENPK1137D_429	-1.38473	0.00724081
gene-CENPK1137D_399	-1.38733	0.00221719
gene-CENPK1137D_3247	-1.428	0.014851
gene-CENPK1137D_4208	-1.46246	0.00863541
gene-CENPK1137D_2521	-1.47642	0.000779751
gene-CENPK1137D_3303	-1.48749	0.00114936
gene-CENPK1137D_4045	-1.49913	9.16747e-05
gene-CENPK1137D_3368	-1.56143	0.00138058
gene-CENPK1137D_3854	-1.66866	8.38001e-05
gene-CENPK1137D_4708	-1.69325	3.20496e-10
gene-CENPK1137D_3277	-1.77899	0.00251453
gene-CENPK1137D_2539	-1.91352	5.9612e-05
gene-CENPK1137D_4598	-1.98412	0.00049731
gene-CENPK1137D_3634	-2.47579	7.91767e-37
